# Supplementary material for: Integrin CD11b negatively regulates Mincle-induced signaling via the Lyn–SIRPα–SHP1 complex
Source: PubMed Central journal article supplement (PMC5992981; doi:10.1038/emm.2017.256), 2018-02-05
Supplement: emm2017256x1.pdf [file emm2017256x1.pdf]

S Fig 1

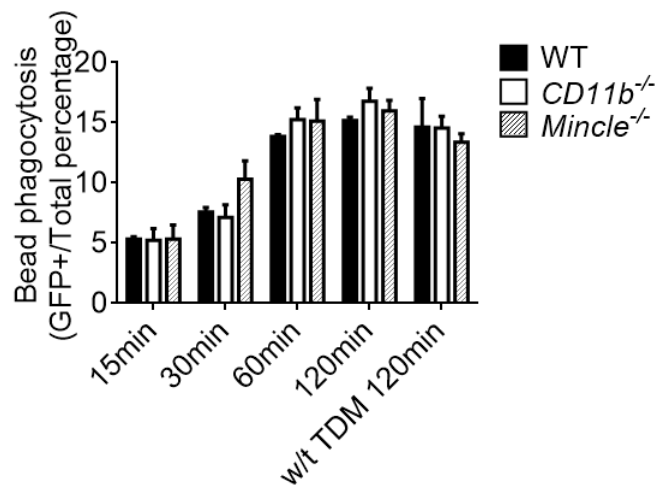

# S Fig 2

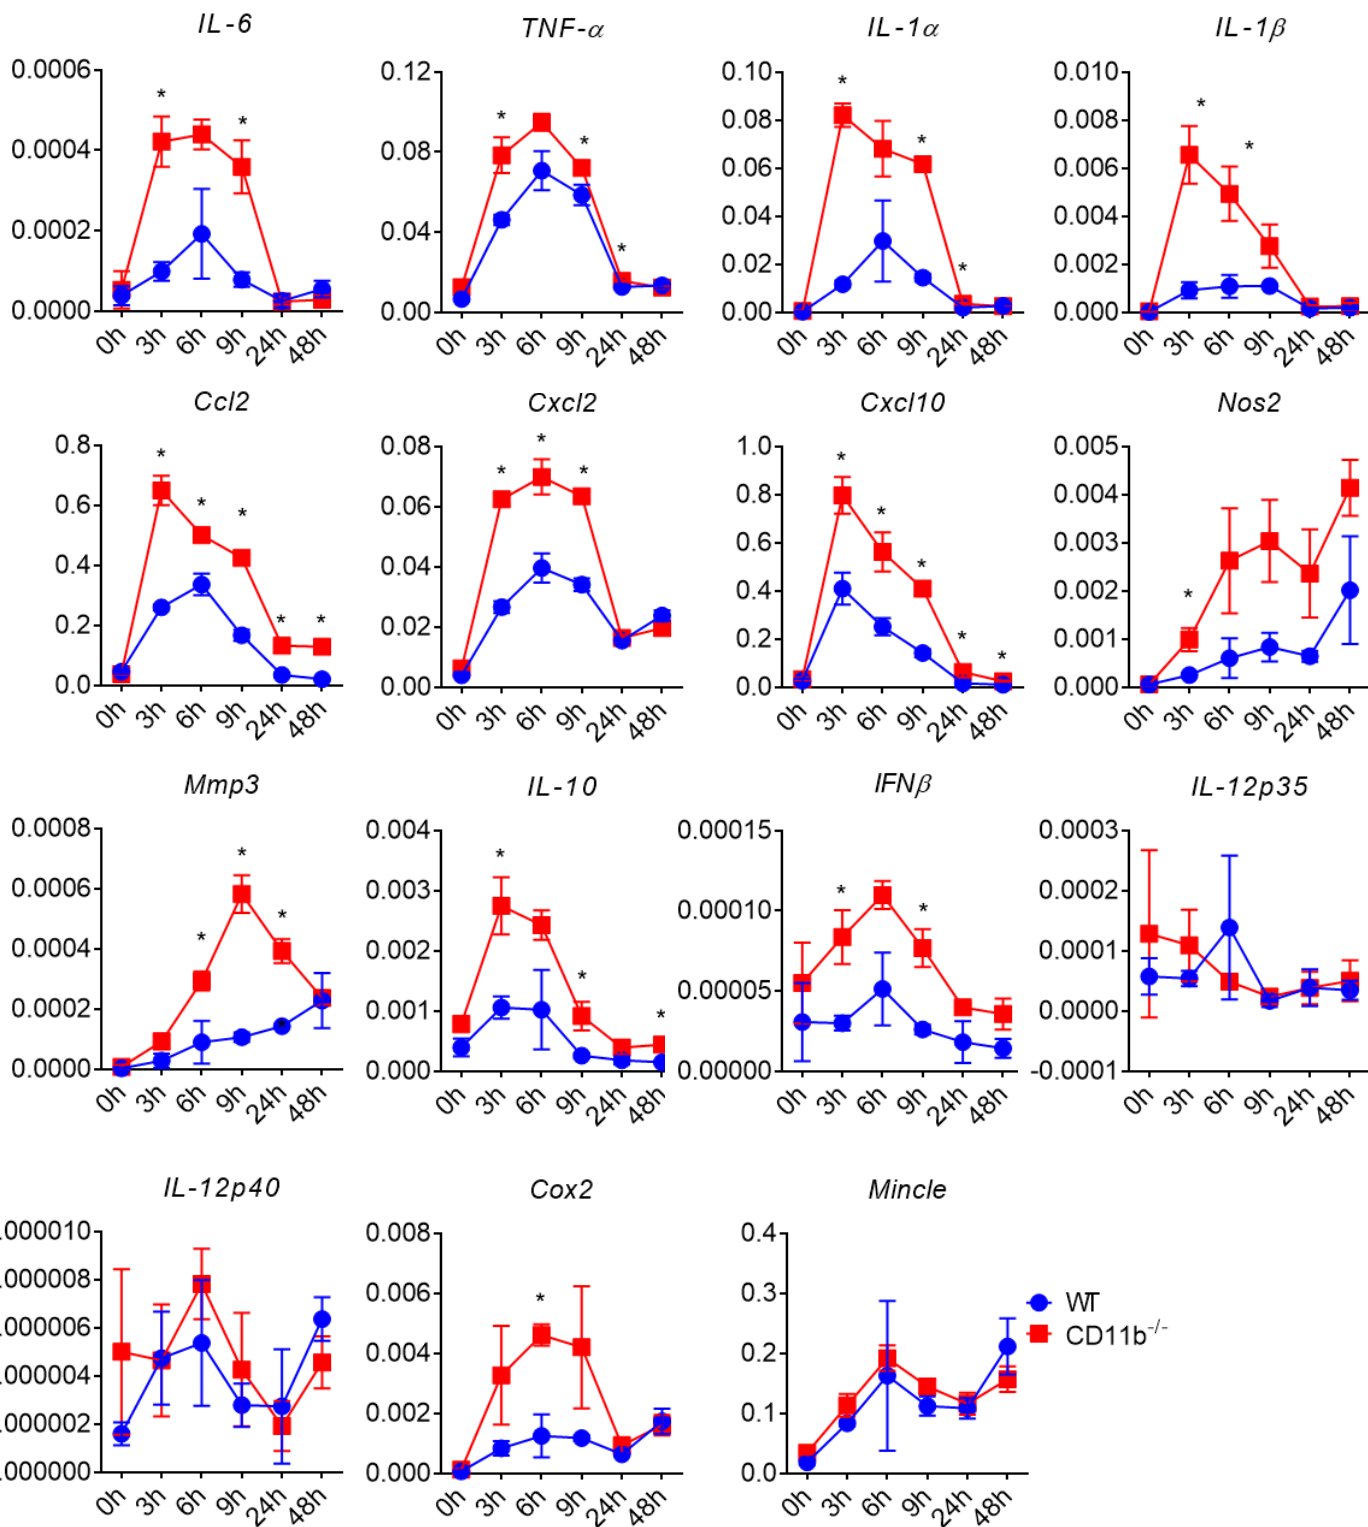

S Fig 3

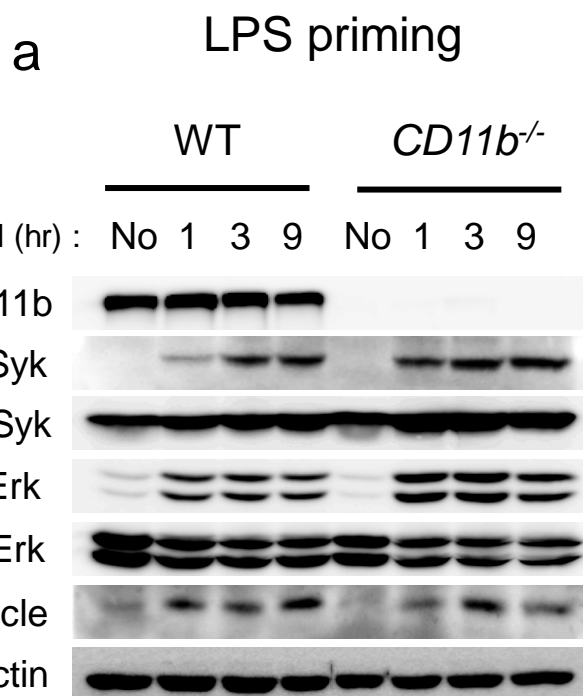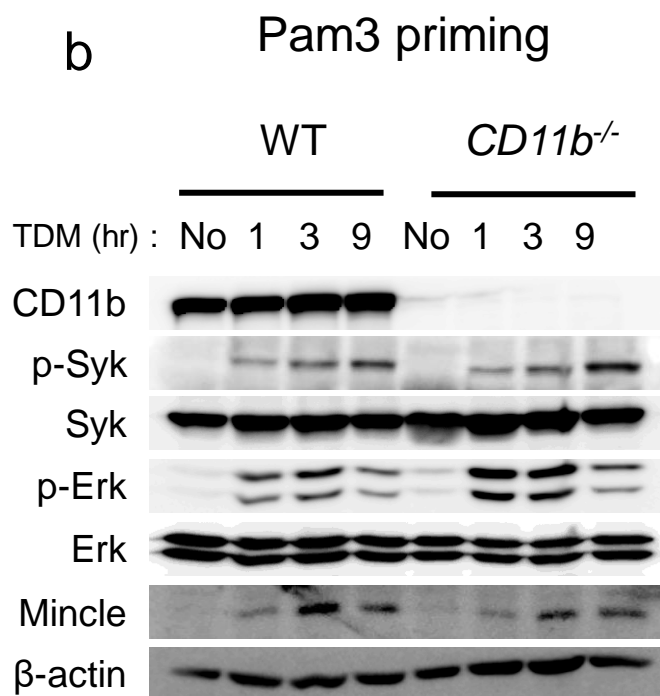

# S Fig 4

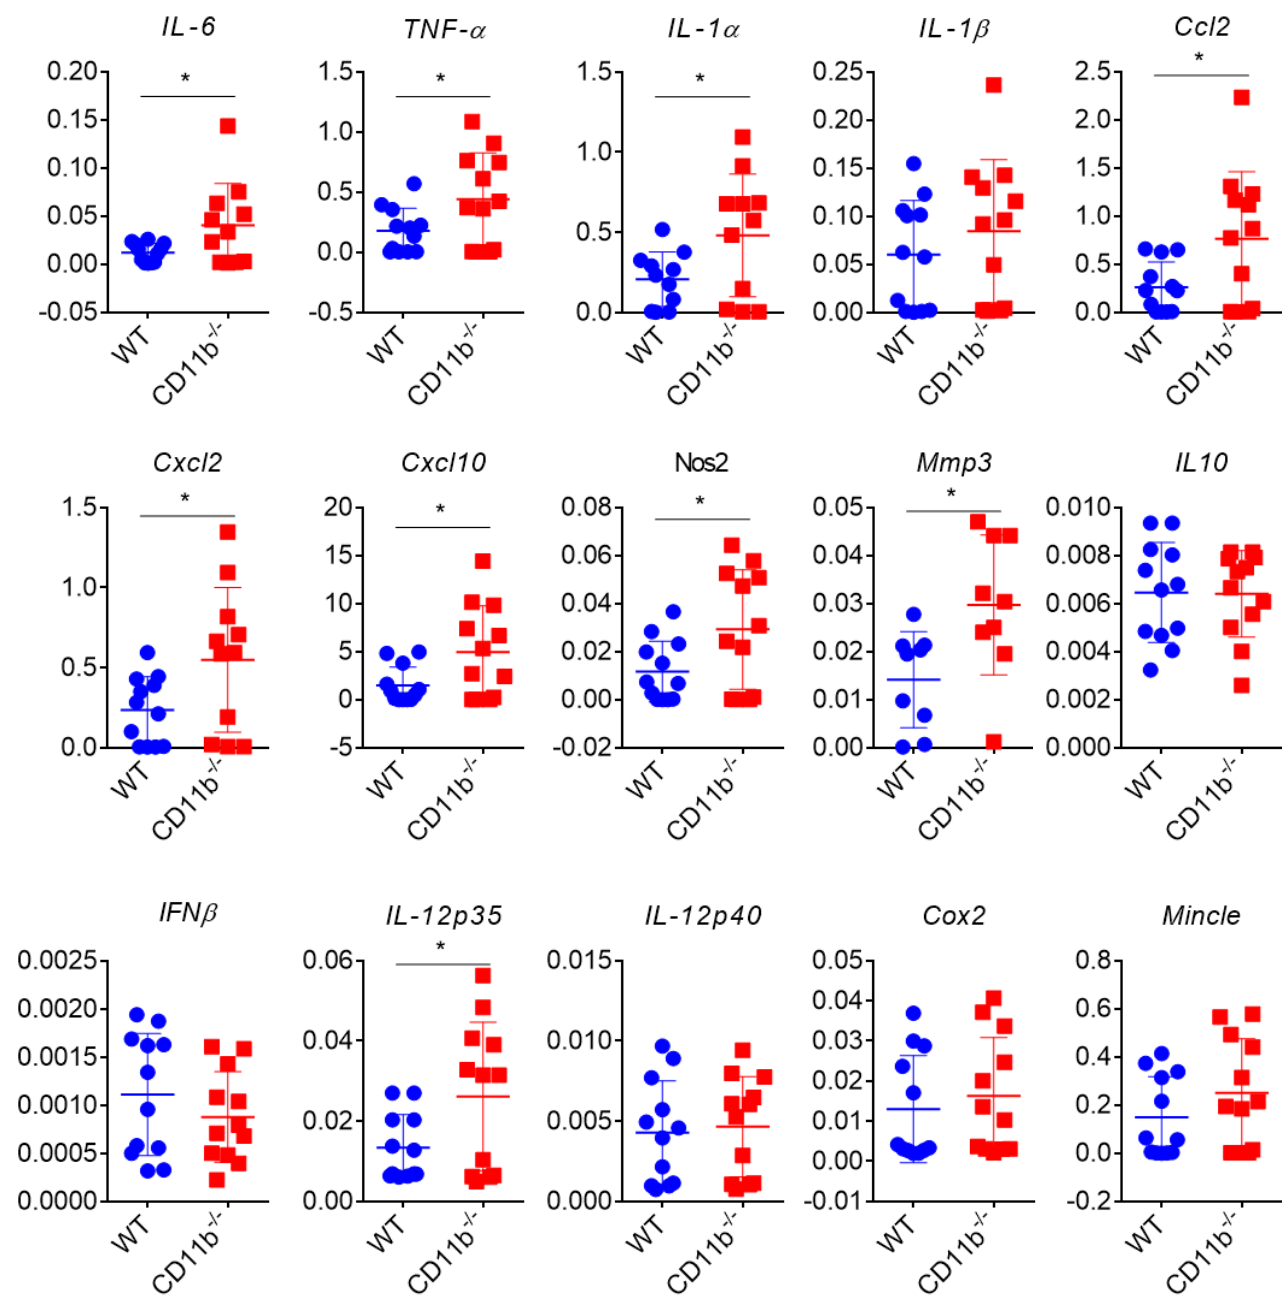

S Fig 5

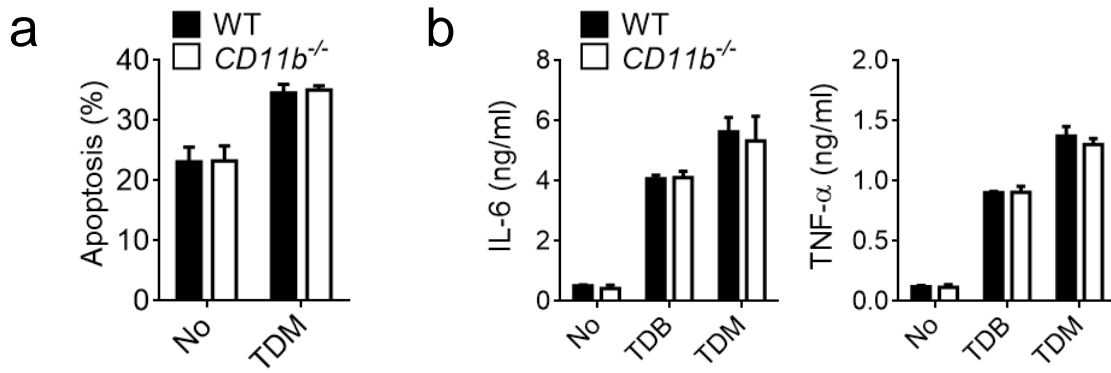

# S Fig 6

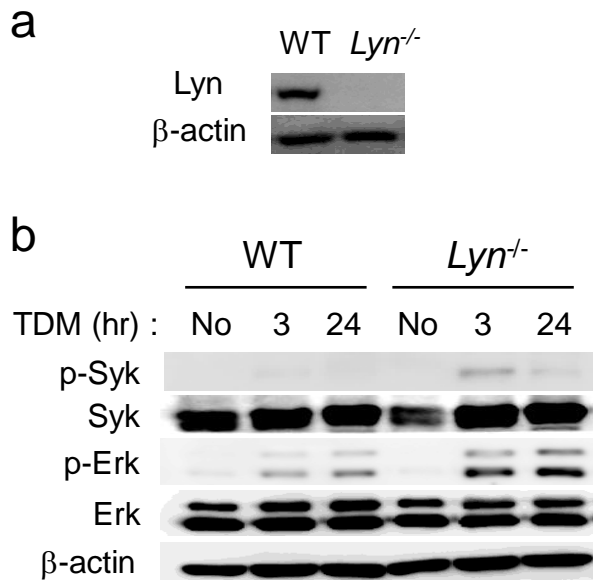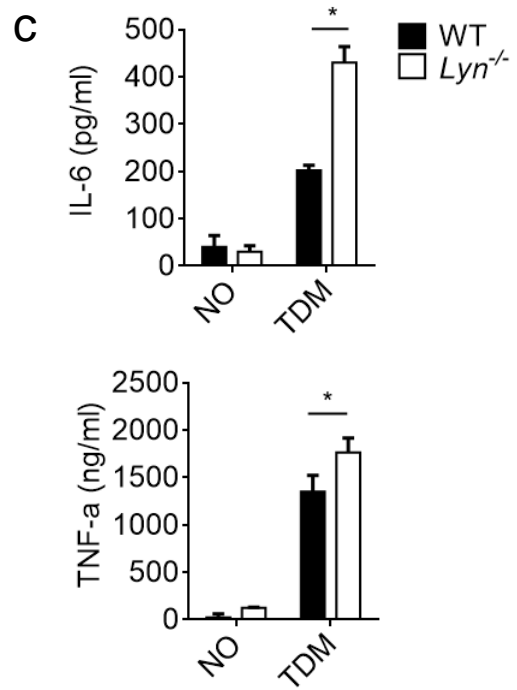

# S Fig 7

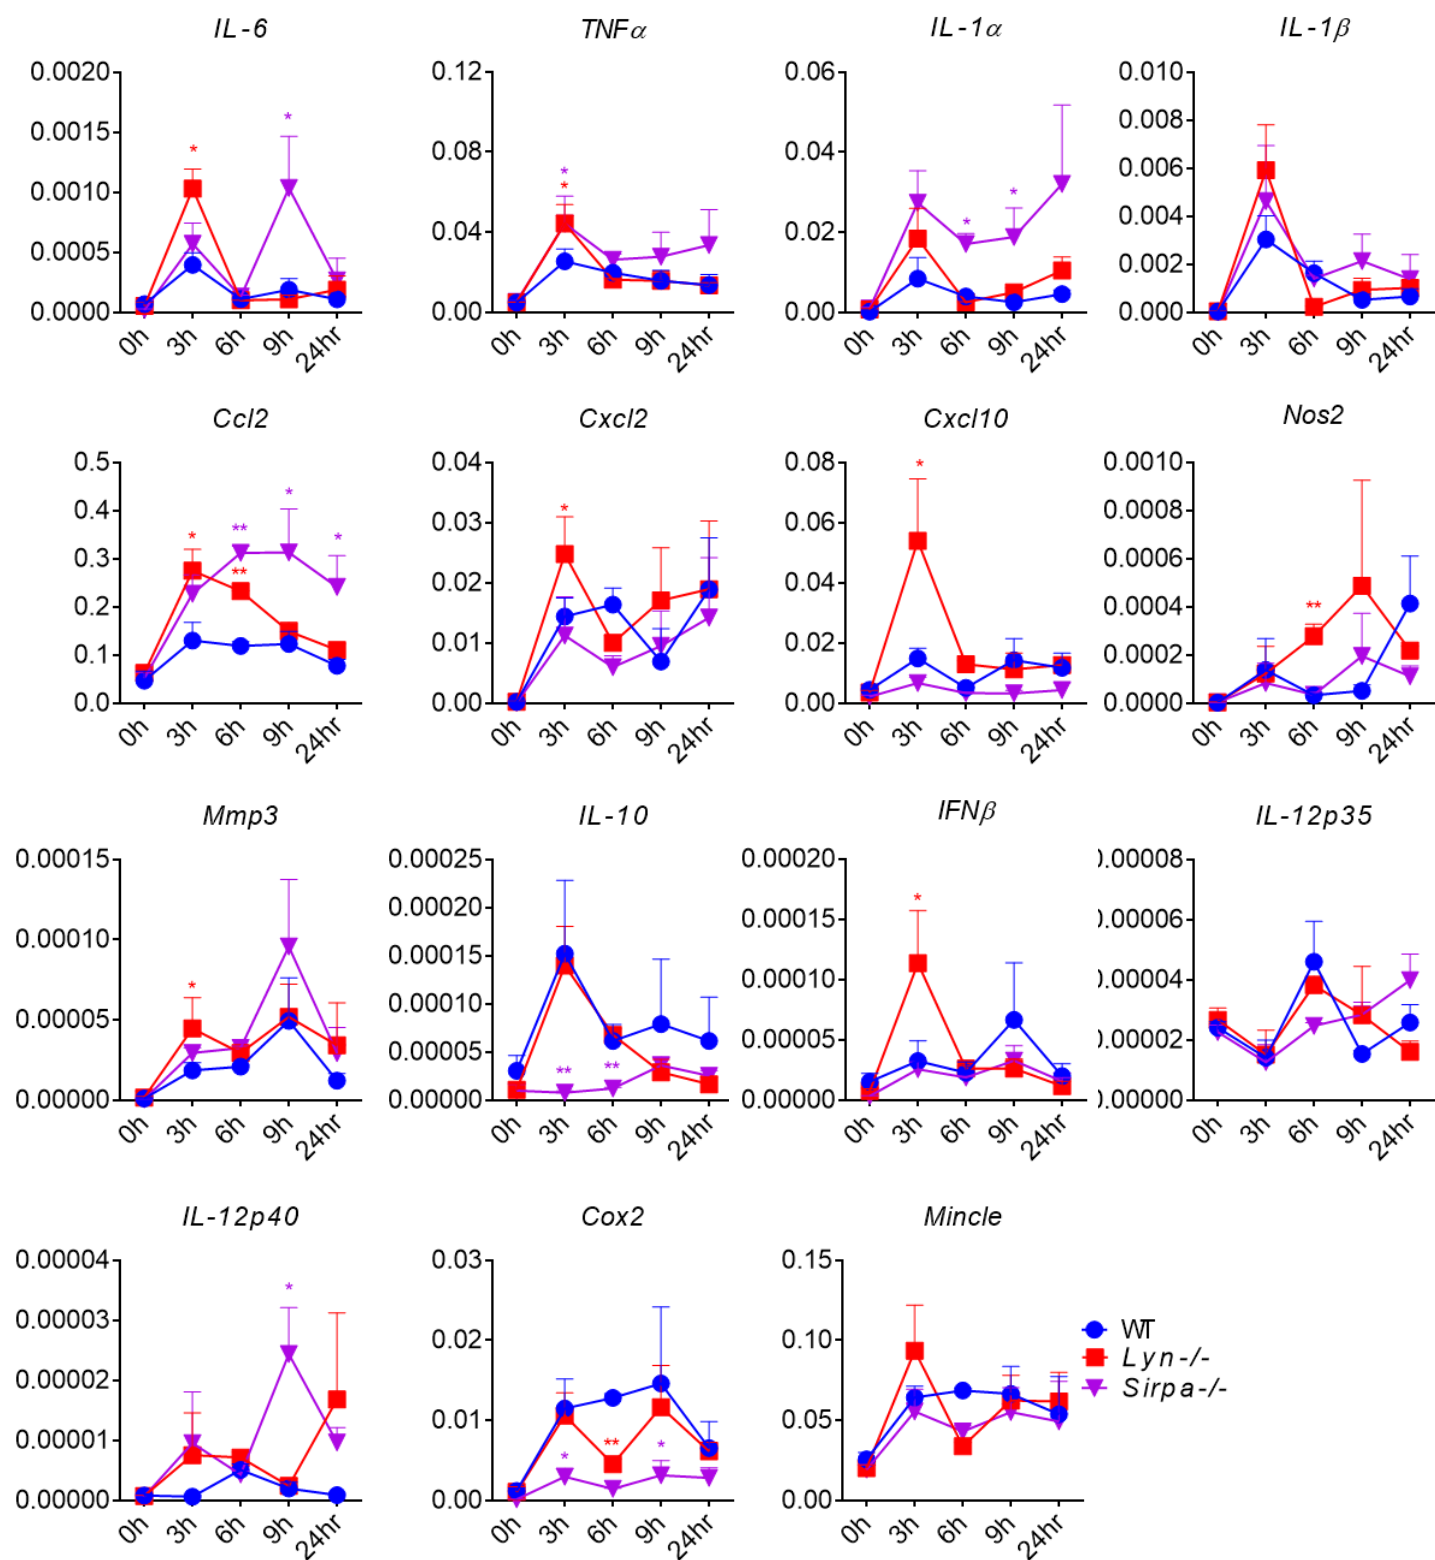

# S Fig 8

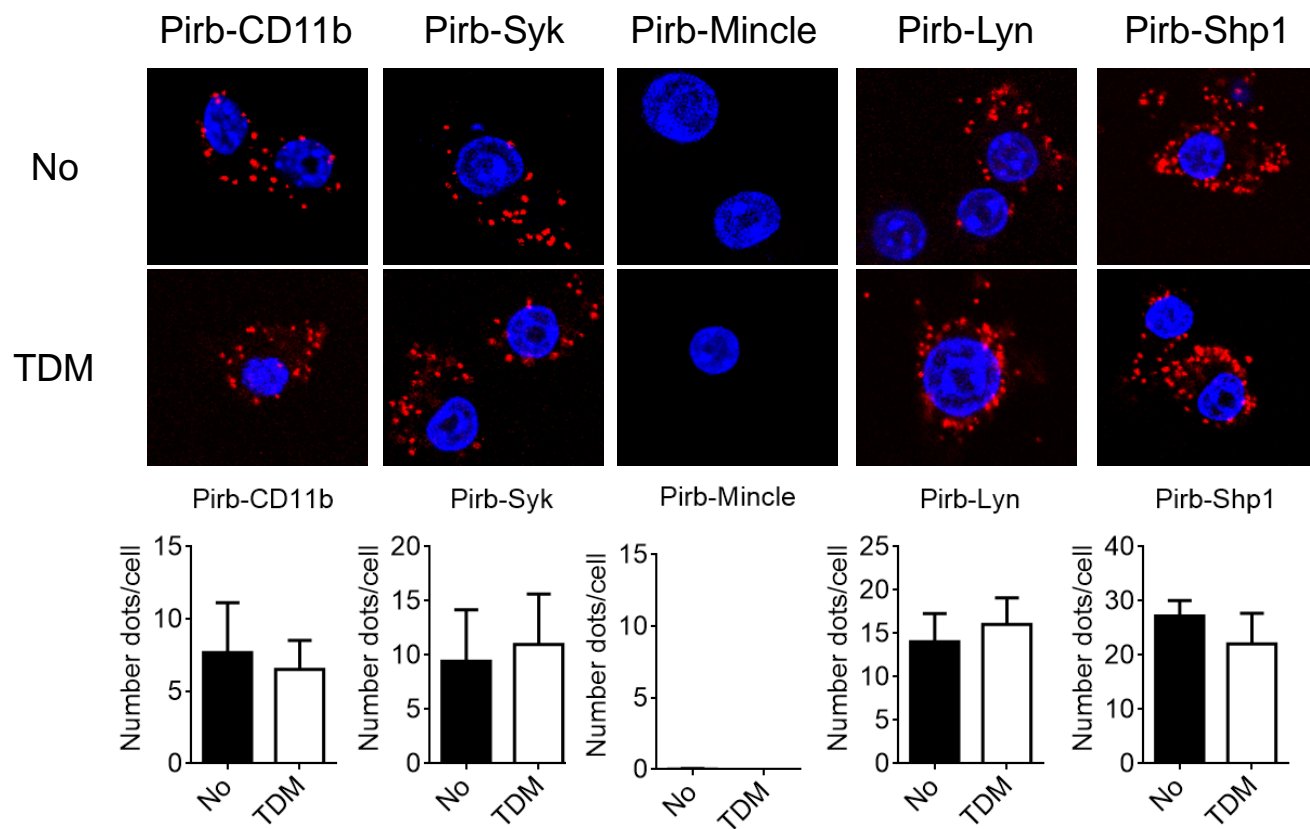



# S Fig 9

## Interaction of endogenous Sirp $\alpha$ with transfected protein

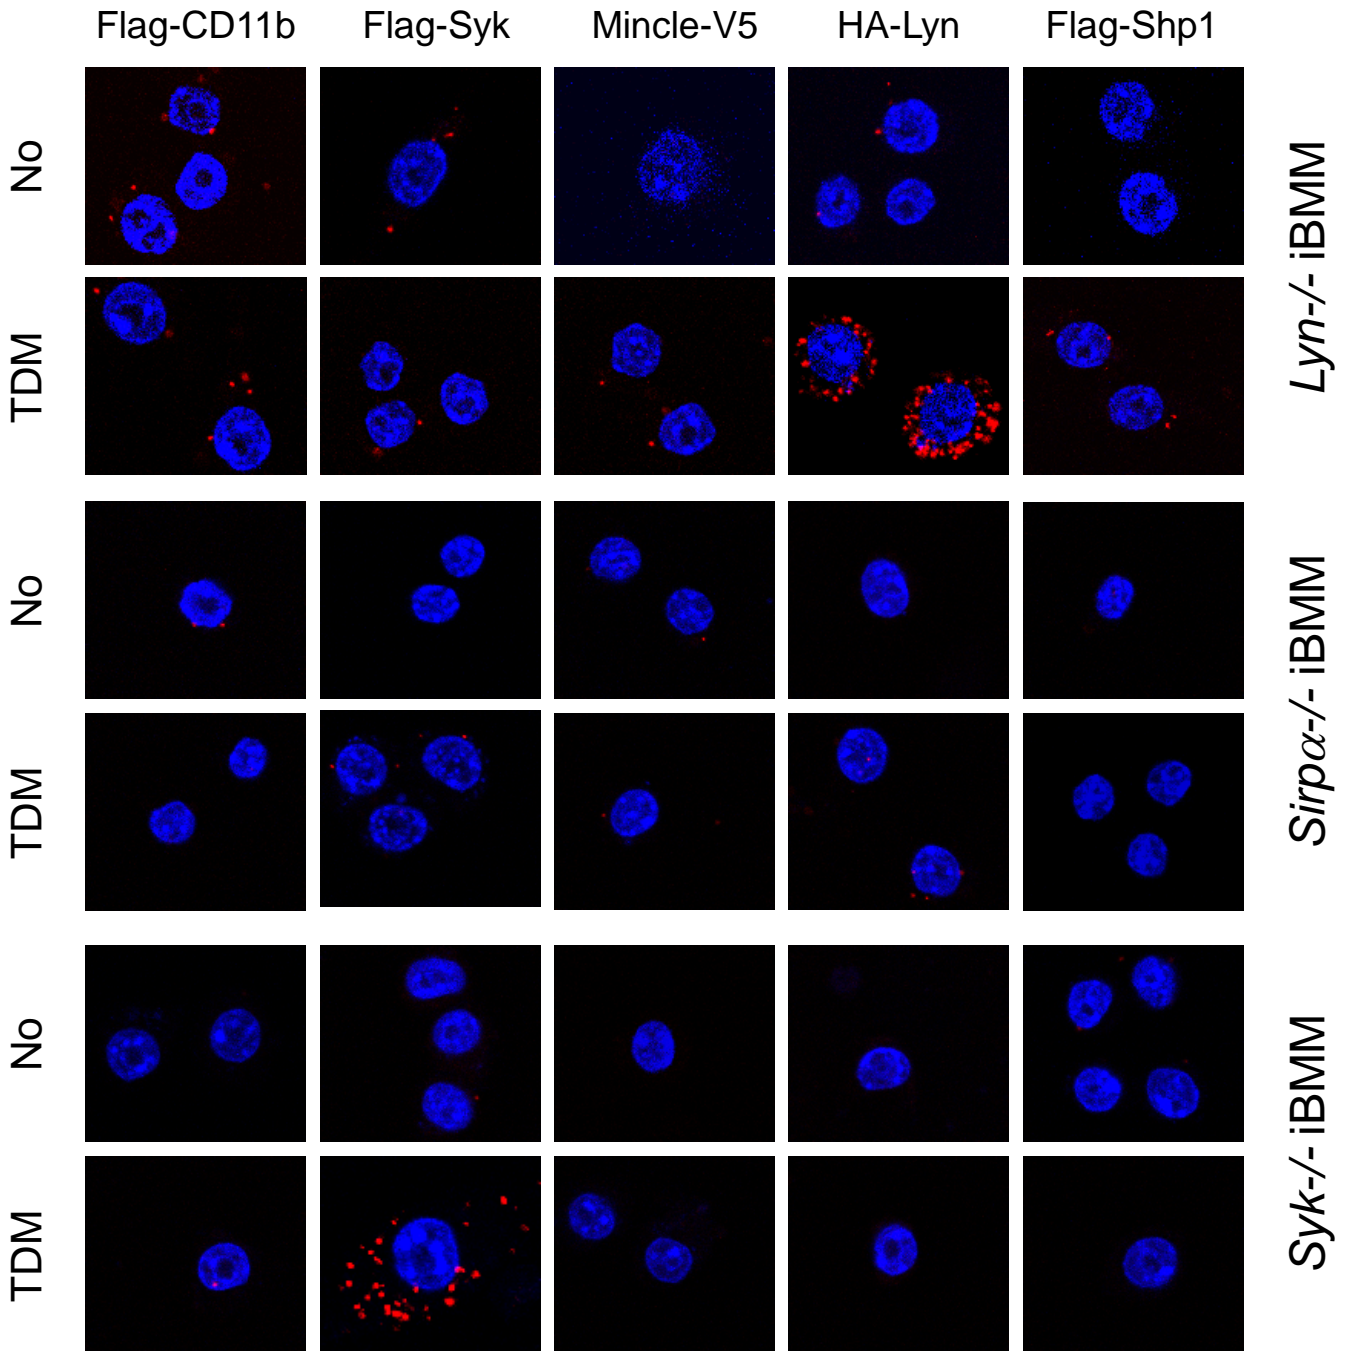

# S Fig 10

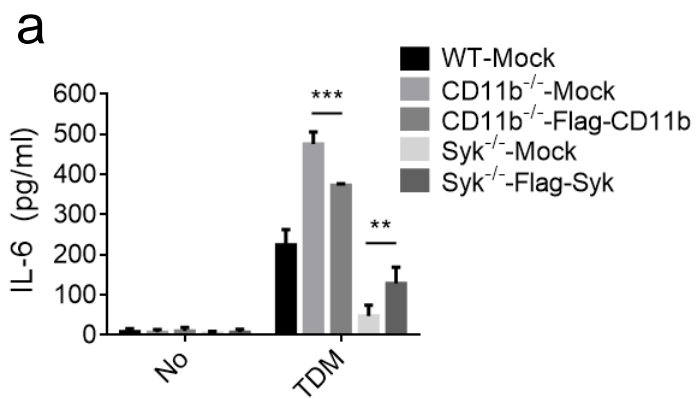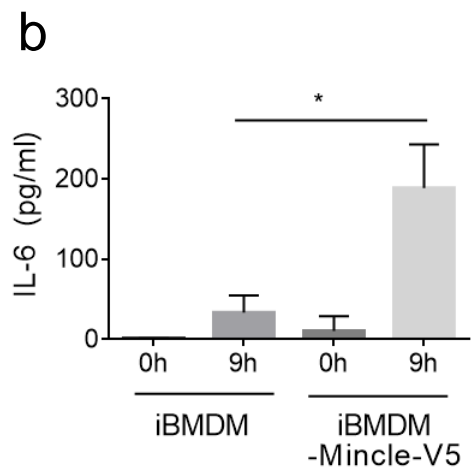

# S Fig 11

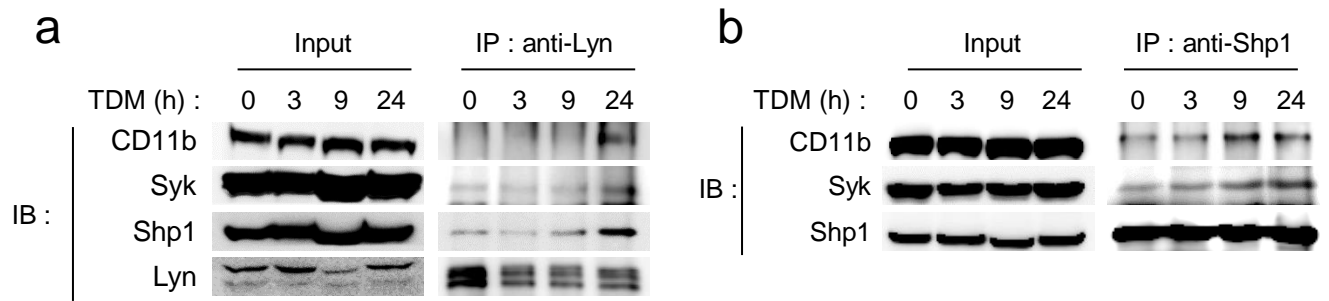

# S Fig 12

## CD11b<sup>-/-</sup> iBMM

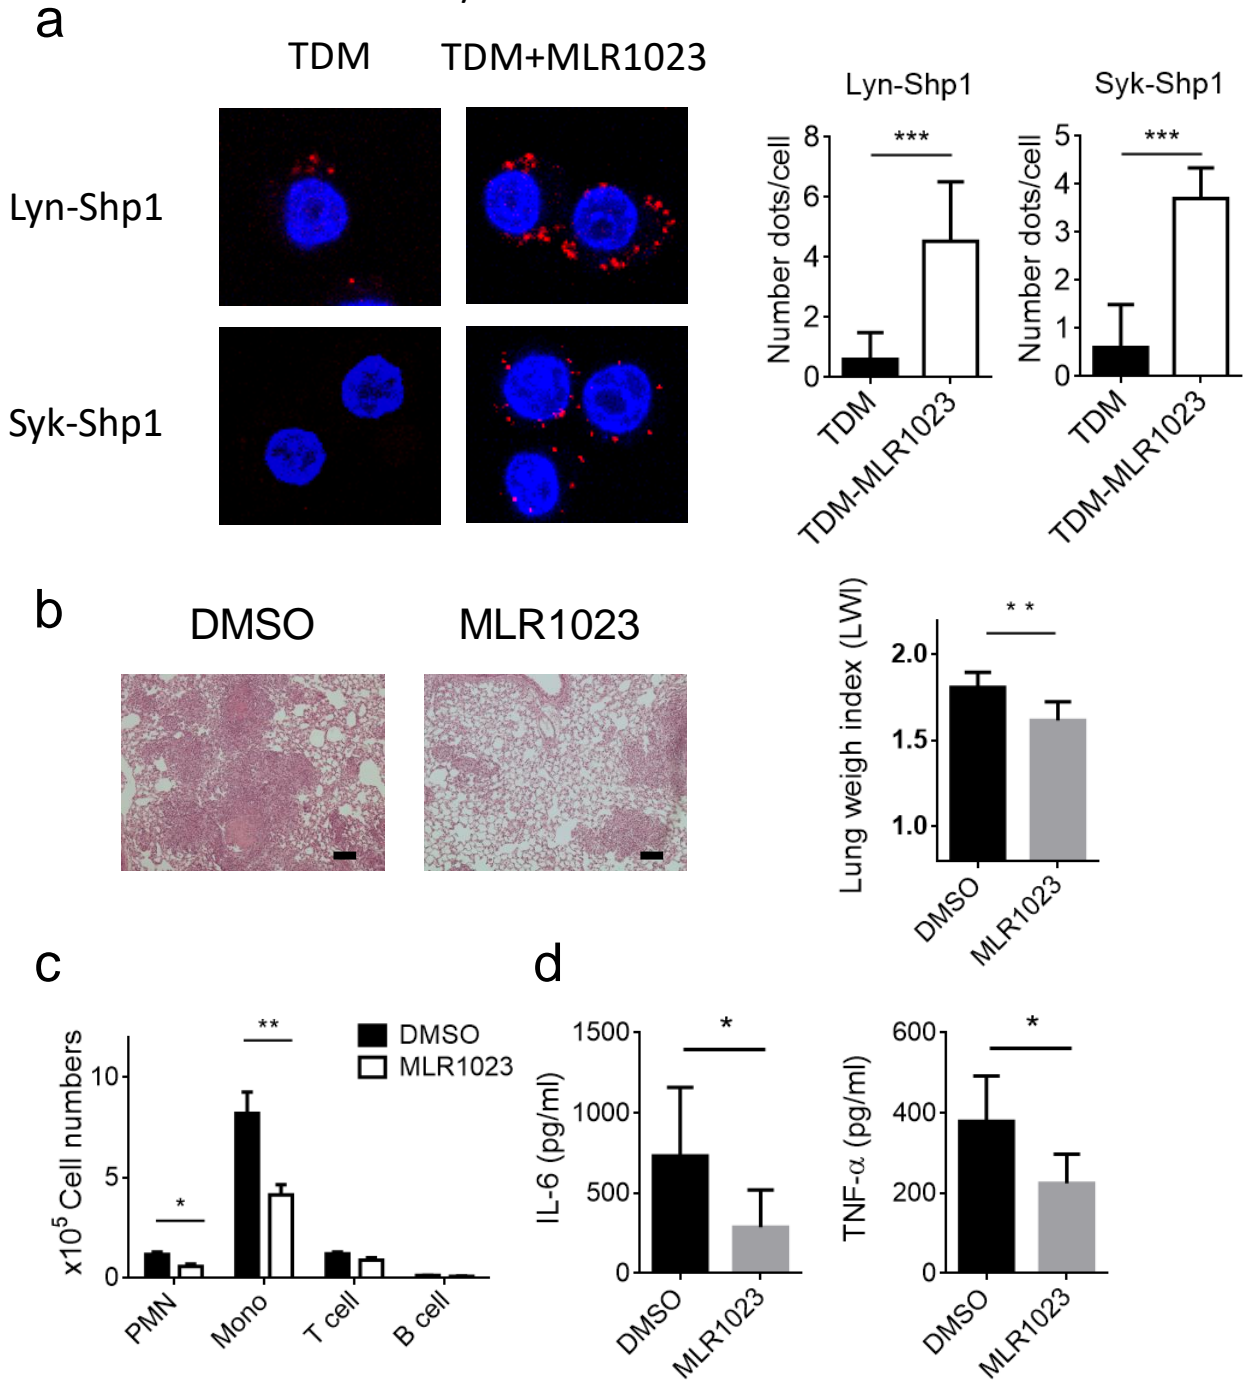

# S Fig 13

## Figure 4a

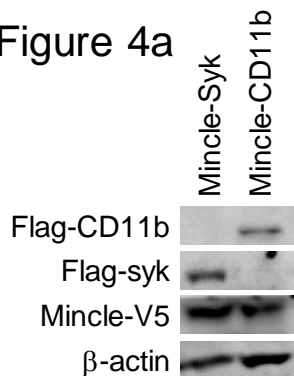

## Figure 4b

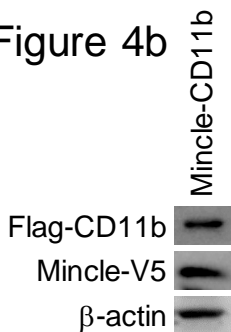

## Figure 4c

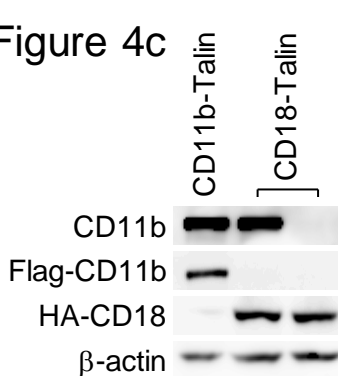

## Figure 6a

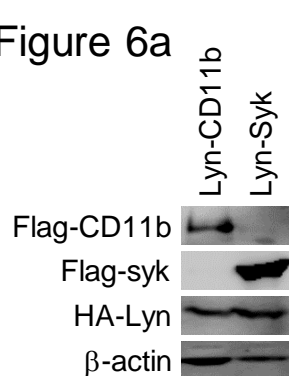

## Figure 6b

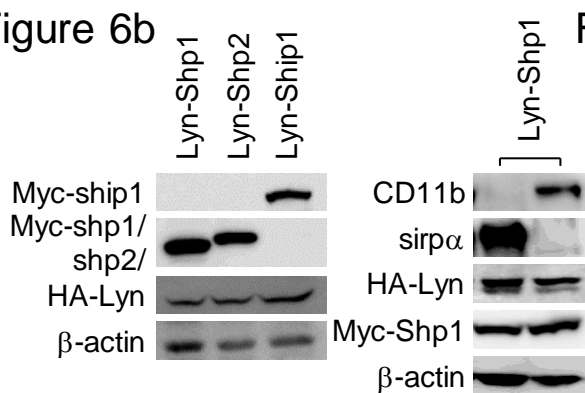

## Figure 6c

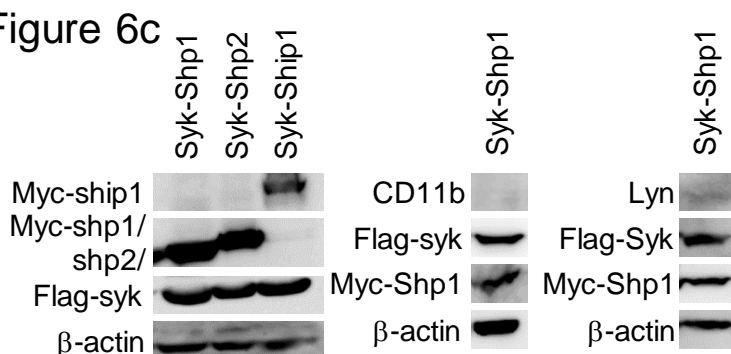

## Figure 7 & S Fig. 8

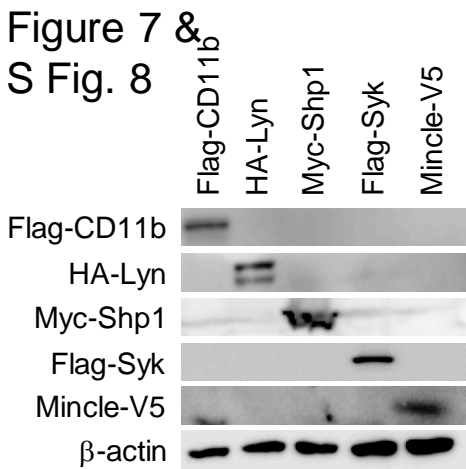

## S Fig. 9

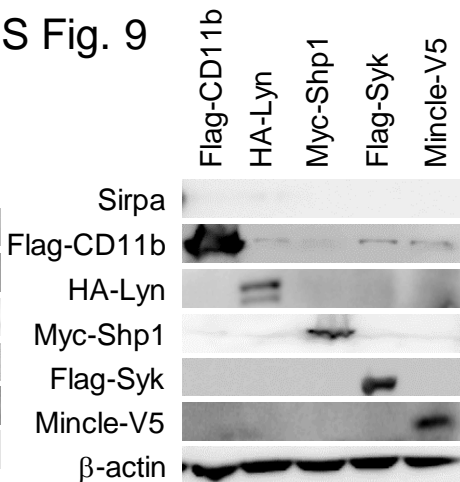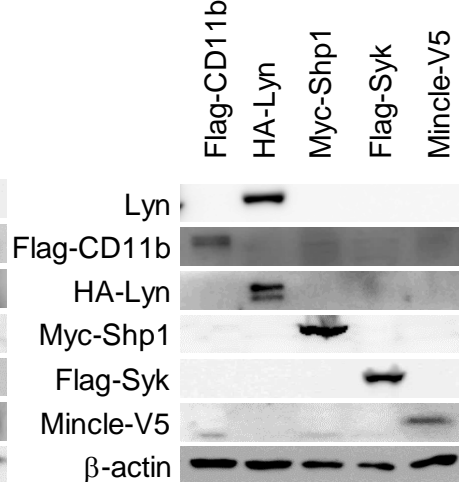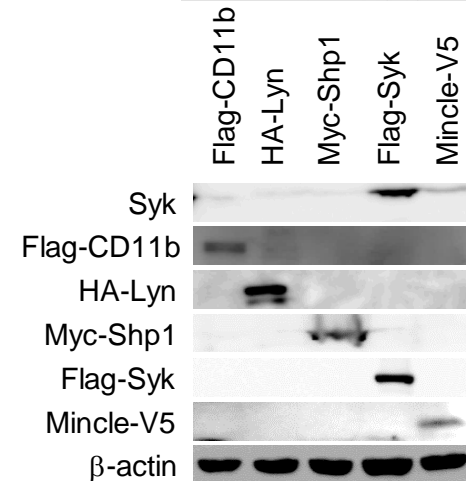

# Supplementary Table 1

## Antibody information

### Western Blot

| <b>Antibody</b>               | <b>Clone</b> | <b>Distributor</b> |
|-------------------------------|--------------|--------------------|
| anti-iNOS                     | #2982S       | Cell Signaling     |
| anti-Phospho-Syk (Tyr525/526) | #2710        | Cell Signaling     |
| anti-Phospho-p44/42 MAPK      | #4370s       | Cell Signaling     |
| anti-Syk Antibody             | #2712s       | Cell Signaling     |
| anti-Lyn (C13F9)              | #2796        | Cell Signaling     |
| anti-SHPS1 (D6I3M)            | #13379       | Cell Signaling     |
| anti-Erk1/2                   | sc-94        | Cell Signaling     |
| anti-SH-PTP1 (SHP-1)          | sc-287       | Santa Cruz         |
| anti-Cox-2                    | sc-1745      | Santa Cruz         |
| HA-probe (Y-11)               | sc-805       | Santa Cruz         |
| anti- $\beta$ -Actin(N-term)  | LF-PA0207    | Abfrontier         |
| anti-CD11b                    | ab75476      | Abcam              |
| anti-V5                       | ab9116       | Abcam              |
| anti-FLAG                     | F7425        | Sigma Aldrich      |
| anti-Myc                      | 06-340       | Millipore          |
| anti-Mincle                   | D292-3       | MBL life science   |

### PLA assay

| <b>Antibody</b> | <b>Clone</b> | <b>Distributor</b> |
|-----------------|--------------|--------------------|
| anti-V5 tag     | ab9137       | Abcam              |
| anti-DDDDK tag  | ab1257       | Abcam              |
| anti-HA tag     | ab9134       | Abcam              |
| anti-Myc tag    | ab9132       | Abcam              |
| anti-V5         | ab9116       | Abcam              |
| anti-Talin 1    | ab57758      | Abcam              |
| anti-Pirb       | sc-9609      | Santa Cruz         |
| anti-SIRP-a     | sc-6922      | Santa Cruz         |
| HA-probe (Y-11) | sc-805       | Santa Cruz         |
| anti-FLAG       | F7425        | Sigma Aldrich      |

# Supplementary Table 2

## Primers

### Real time-PCR

| Gene     | GeneBank_ID  | 5'Forward sequence3'     | 3'Reverse sequence5'     |
|----------|--------------|--------------------------|--------------------------|
| Il-6     | NM_031168    | CCAAGACCATCCAATTCATC     | CCACAAACTGATATGCTTAGG    |
| TNFa     | NM_013693    | ATGTCCATTCTGAGTTCTG      | AATCTGGAAAGGTCTGAAGG     |
| IL-1a    | NM_010554    | AGGGAGTCAACTCATTGGCG     | CTTCCCGTTGCTTGACGTTG     |
| IL-1b    | NM_008361    | TCAACCAACAAGTGATATTCTC   | ACACAGGACAGGTATAGATTC    |
| Cxcl2    | NM_009140    | CATCCCACCCACACAGTGAAAGAG | CCTTCCATGAAAGCCATCCGACTG |
| Ccl2     | NM_011333    | TTCCACAACCACCTCAAGCACTTC | TTAAGGCATCACAGTCCGAGTCAC |
| Cxcl10   | NM_021274    | TCGCTCAAGTGGCTGGGATGG    | GGGCATGGCACATGGTGAAGG    |
| Nos2     | NM_010927    | AATCTTGGAGCGAGTTGTGG     | CAGGAAGTAGGTGAGGGCTTG    |
| Mincle   | NM_019948    | AGTGAGGCATCAGTTTCAGTCAAG | GACCAGGTCAAGGTTGTCGTAGAG |
| Cox-2    | NM_011198    | GCCCGTGCTGCTCTGTCTTAAC   | GTTGCTCTAGGCTTTGCTGGCTAC |
| Mmp3     | NM_010809    | CTCATGCCTATGCACCTGGA     | GGCTGAGTGGTAGAGTCCCA     |
| IL-12p35 | NM_001159424 | TTTGATGATGACCCTGTGCCTTGG | GATTCTGAAGTGTGCGTTGATGG  |
| IL-12p40 | NM_001303244 | AGTAAAGACATAGGTGGTATTTG  | CTGGTTTCTTATCAATATCACTTC |
| IL-10    | NM_010548    | GCACTACCAAAGCCACAAAGCAG  | GTCAGTAAGAGCAGGCAGCATAGC |
| IFNb     | NM_010510    | CCACTTGAAGAGCTATTACTG    | AATGATGAGAAAGTTCCTGAAG   |
| Src      | NM_009271    | CGCCTCACTACCGTATGTCC     | CAACACCCGGAAGCCTAGAG     |
| Yes      | NM_009535    | CGGCAAGACAAGGTGCAAAA     | CCTGTGGAGTAACAGCCAAGT    |
| Fyn      | NM_001122893 | GCCACATAGCTACAGGACCG     | AATCACAGTTCGCTGGAGCA     |
| Fgr      | NM_010208    | GCTGGAAGTTAGGGTTGGCT     | GCCTCATAGTCGTACAGGGC     |
| Lck      | NM_001162432 | ATGGAGAACGGGAGCCTAGT     | GACACGCATCAATCGCAGAC     |
| Hck      | NM_001172117 | CCTCCGAGATGGAAGCAAGG     | GCCACTTTGGTGTGCTTGTT     |
| Blk      | NM_007549    | GCCCCAGTAGAGACTCTGGA     | GCCTGGGGATTTCCCATTC      |
| Lyn      | NM_001111096 | AGGAAGAACACCCTGGATGC     | CATTTTCTGGGGTTGTGCG      |
| Frk      | NM_001159544 | CTATTGTGCGGCACCGAATG     | AGGCAAAGGTGTCCCAAACA     |
| Gapdh    | NM_008084    | GGCAAATTCACGGCACAGTCAAG  | TCGCTCCTGGAAGATGGTATGG   |

## Crispr-Cas9 gRNA

| Gene          | 5'Forward sequence3'       | 3'Reverse sequence5'      |
|---------------|----------------------------|---------------------------|
| CD11b         | CACCGCTTGTGTCATGGCTTCAATC  | AAACGATTGAAGCCATGACACAAGC |
| Lyn           | CACCGGTTCCGGTCAGTATTACGTAC | AAACGTACGTAATACTGACCGAACC |
| Sirp $\alpha$ | CACCGCCGCGGCCCATGGAGCCCGC  | AAACGCGGGCTCCATGGGCCGCGGC |
| Syk           | CACCGTATTGCACTACCGCATTGAC  | AAACGTCAATGCGGTAGTGCAATAC |

## Supplementary Table 2 continued

Primers

Cloning

| Plasmid           |         | Primer sequence                   | Restriction Enzyme |
|-------------------|---------|-----------------------------------|--------------------|
| pCS4-3×flag-shp1  | Forward | AATGAATTCAATGGTGAGGTGGTTTCA       | EcoRI              |
|                   | Reverse | ATTCTCGAGTCACTTCCTCTTGAGAGAAC     | XhoI               |
| pCS2-6×myc-shp2   | Forward | AGTGAATTCAATGACATCGCGGAGAT        | EcoRI              |
|                   | Reverse | TGATCTAGATCATCTGAAACTCCTCTGCT     | XbaI               |
| pCS2-6×myc-shp1   | Forward | ATTGAATTCAATGCCTGCCATGGT          | EcoRI              |
|                   | Reverse | AAACTCGAGTCACTGCATGGCAGTC         | XhoI               |
| pCS4-3×flag-syk   | Forward | AATGAATTCAATGGCGGGAAGTG           | EcoRI              |
|                   | Reverse | ATTCTCGAGTTAGTTAACCACGTCGTAGT     | XhoI               |
| pCS4-3×flag-CD11b | Forward | AAATCTAGATATGACTCTTAAAGCTCTTCT    | XbaI               |
|                   | Reverse | ATAGCTAGCTTACTGAGGTGGG            | NheI               |
| pCS4-3×flag-CD18  | Forward | ATTGAATTCAATGCTGGGCCCACT          | EcoRI              |
|                   | Reverse | AAACTCGAGCTAGCTTTCAGCAAATT        | XhoI               |
| pCS4-3×HA-Lyn     | Forward | GCGAGATCTGGATGGGATGTATTAATC       | BglII              |
|                   | Reverse | ATTCTCGAGCTACGGTTGCTGCTGA         | XhoI               |
| pcDNA3.1-MincleV5 | Forward | CCCGATCCACCATGAATTCAACCAAATCGCCTG | BamHI              |
|                   | Reverse | CCGCTCGAGGTCCAGAGGACTTATTTCTGGCAT | XhoI               |
| pcDNA4-FceR1g-Myc | Forward | CCCAAGCTTATGATCTCAGCCGTGATCTT     | HindIII            |
|                   | Reverse | CGCCTCGAGCTGGGGTGGTTTCTCATGCTT    | XhoI               |

Site-directed mutagenesis

| Mutation      |         | Primer sequence                        |
|---------------|---------|----------------------------------------|
| Shp1 DN C453S | Forward | GGCCCATCATTGTGCATAGCAGCGCTGGCATCGGCC   |
|               | Reverse | GGCCGATGCCAGCGCTGCTATGCACAATGATGGGCC   |
| Shp1 DN D419A | Forward | AGTACCTGAGCTGGCCTGCCCATGGGGTTCCAGTGAG  |
|               | Reverse | CTCACTGGGAACCCCATGGGCAGGCCAGCTCAGGTACT |
