# Supplementary material for: Integrin CD11b negatively regulates Mincle-induced signaling via the Lyn–SIRPα–SHP1 complex
Source: PubMed Central journal article supplement (PMC5992981; doi:10.1038/emm.2017.256), 2018-02-05
Supplement: emm2017256x3.pdf [file emm2017256x3.pdf]

**Supplementary Table 1.** List of primary antibodies used in western blot and PLA assay, along with the sources.

**Supplementary Table 2.** List of primers used in real time-PCR, CRISPR-CAS9 gRNA, cloning, and site-directed mutagenesis.

# Supplementary Table 1

## Antibody information

### Western Blot

| Antibody                      | Clone     | Distributor      |
|-------------------------------|-----------|------------------|
| anti-iNOS                     | #2982S    | Cell Signaling   |
| anti-Phospho-Syk (Tyr525/526) | #2710     | Cell Signaling   |
| anti-Phospho-p44/42 MAPK      | #4370s    | Cell Signaling   |
| anti-Syk Antibody             | #2712s    | Cell Signaling   |
| anti-Lyn (C13F9)              | #2796     | Cell Signaling   |
| anti-SHPS1 (D6I3M)            | #13379    | Cell Signaling   |
| anti-Erk1/2                   | sc-94     | Cell Signaling   |
| anti-SH-PTP1 (SHP-1)          | sc-287    | Santa Cruz       |
| anti-Cox-2                    | sc-1745   | Santa Cruz       |
| HA-probe (Y-11)               | sc-805    | Santa Cruz       |
| anti- $\beta$ -Actin(N-term)  | LF-PA0207 | Abfrontier       |
| anti-CD11b                    | ab75476   | Abcam            |
| anti-V5                       | ab9116    | Abcam            |
| anti-FLAG                     | F7425     | Sigma Aldrich    |
| anti-Myc                      | 06-340    | Millipore        |
| anti-Mincle                   | D292-3    | MBL life science |

### PLA assay

| Antibody        | Clone   | Distributor   |
|-----------------|---------|---------------|
| anti-V5 tag     | ab9137  | Abcam         |
| anti-DDDDK tag  | ab1257  | Abcam         |
| anti-HA tag     | ab9134  | Abcam         |
| anti-Myc tag    | ab9132  | Abcam         |
| anti-V5         | ab9116  | Abcam         |
| anti-Talin 1    | ab57758 | Abcam         |
| anti-Pirb       | sc-9609 | Santa Cruz    |
| anti-SIRP-a     | sc-6922 | Santa Cruz    |
| HA-probe (Y-11) | sc-805  | Santa Cruz    |
| anti-FLAG       | F7425   | Sigma Aldrich |

# Supplementary Table 2

## Primers

### Real time-PCR

| Gene         | GeneBank ID  | 5'Forward sequence3'     | 3'Reverse sequence5'     |
|--------------|--------------|--------------------------|--------------------------|
| Il-6         | NM 031168    | CCAAGACCATCCAATTCATC     | CCACAAACTGATATGCTTAGG    |
| TNF $\alpha$ | NM 013693    | ATGTCCATTCTGAGTTCTG      | AATCTGGAAAGGTCTGAAGG     |
| IL-1a        | NM 010554    | AGGGAGTCAACTCATTGGCG     | CTTCCCGTTGCTTGACGTTG     |
| IL-1b        | NM 008361    | TCAACCAACAAGTGATATTCTC   | ACACAGGACAGGTATAGATTC    |
| Cxcl2        | NM 009140    | CATCCCACCCACACAGTGAAAGAG | CCTTCCATGAAAGCCATCCGACTG |
| Ccl2         | NM 011333    | TTCCACAACCACCTCAAGCACTTC | TTAAGGCATCACAGTCCGAGTCAC |
| Cxcl10       | NM 021274    | TCGCTCAAGTGGCTGGGATGG    | GGGCATGGCACATGGTGAAGG    |
| Nos2         | NM 010927    | AATCTTGGAGCGAGTTGTGG     | CAGGAAGTAGGTGAGGGCTTG    |
| Mincle       | NM 019948    | AGTGAGGCATCAGTTTCAGTCAAG | GACCAGGTCAAGGTTGTCGTAGAG |
| Cox-2        | NM 011198    | GCCCGTGCTGCTCTGTCTTAAC   | GTTGCTCTAGGCTTTGCTGGCTAC |
| Mmp3         | NM 010809    | CTCATGCCTATGCACCTGGA     | GGCTGAGTGGTAGAGTCCCA     |
| IL-12p35     | NM 001159424 | TTTGATGATGACCCTGTGCCTTGG | GATTCTGAAGTCTGCGTTGATGG  |
| IL-12p40     | NM 001303244 | AGTAAAGACATAGGTGGTATTTG  | CTGGTTTCTTATCAATATCACTTC |
| IL-10        | NM 010548    | GCACTACCAAAGCCACAAAGCAG  | GTCAGTAAGAGCAGGCAGCATAGC |
| IFN $\beta$  | NM 010510    | CCACTTGAAGAGCTATTACTG    | AATGATGAGAAAGTTCCTGAAG   |
| Src          | NM 009271    | CGCCTCACTACCGTATGTCC     | CAACACCCGGAAGCCTAGAG     |
| Yes          | NM 009535    | CGGCAAGACAAGGTGCAAAA     | CCTGTGGAGTAACAGCCAAGT    |
| Fyn          | NM 001122893 | GCCACATAGCTACAGGACCG     | AATCACAGTTCGCTGGAGCA     |
| Fgr          | NM 010208    | GCTGGAAGTTAGGGTTGGCT     | GCCTCATAGTCGTACAGGGC     |
| Lck          | NM 001162432 | ATGGAGAACGGGAGCCTAGT     | GACACGCATCAATCGCAGAC     |
| Hck          | NM 001172117 | CCTCCGAGATGGAAGCAAGG     | GCCACTTTGGTGTGCTTGTT     |
| Blk          | NM 007549    | GCCCAGTAGAGACTCTGGA      | GCCTGGGGATTTCCCATTC      |
| Lyn          | NM 001111096 | AGGAAGAACACCCTGGATGC     | CATTTTCTGGGGTTGTGCG      |
| Frk          | NM 001159544 | CTATTGTGCGGCACCGAATG     | AGGCAAAGGTGTCCCAAACA     |
| Gapdh        | NM 008084    | GGCAAATCAACGGCACAGTCAAG  | TCGCTCCTGGAAGATGGTATGG   |

### Crispr-Cas9 gRNA

| Gene          | 5'Forward sequence3'       | 3'Reverse sequence5'      |
|---------------|----------------------------|---------------------------|
| CD11b         | CACCGCTTGTGTCATGGCTTCAATC  | AAACGATTGAAGCCATGACACAAGC |
| Lyn           | CACCGGTTCCGGTCAGTATTACGTAC | AAACGTACGTAATACTGACCGAACC |
| Sirp $\alpha$ | CACCGCCGCGGCCCATGGAGCCCGC  | AAACGCGGGCTCCATGGGCCGCGGC |
| Syk           | CACCGTATTGCACTACCGCATTGAC  | AAACGTCAATGCGGTAGTGCAATAC |

## Supplementary Table 2 continued

Primers

Cloning

| Plasmid           |         | Primer sequence                   | Restriction Enzyme |
|-------------------|---------|-----------------------------------|--------------------|
| pCS4-3×flag-shp1  | Forward | AATGAATTCAATGGTGAGGTGGTTTCA       | EcoRI              |
|                   | Reverse | ATTCTCGAGTCACTTCCTCTTGAGAGAAC     | XhoI               |
| pCS2-6×myc-shp2   | Forward | AGTGAATTCAATGACATCGCGGAGAT        | EcoRI              |
|                   | Reverse | TGATCTAGATCATCTGAAACTCCTCTGCT     | XbaI               |
| pCS2-6×myc-shp1   | Forward | ATTGAATTCAATGCCTGCCATGGT          | EcoRI              |
|                   | Reverse | AAACTCGAGTCACTGCATGGCAGTC         | XhoI               |
| pCS4-3×flag-syk   | Forward | AATGAATTCAATGGCGGGAAGTG           | EcoRI              |
|                   | Reverse | ATTCTCGAGTTAGTTAACCACGTCGTAGT     | XhoI               |
| pCS4-3×flag-CD11b | Forward | AAATCTAGATATGACTCTTAAAGCTCTTCT    | XbaI               |
|                   | Reverse | ATAGCTAGCTTACTGAGGTGGG            | NheI               |
| pCS4-3×flag-CD18  | Forward | ATTGAATTCAATGCTGGGCCCACT          | EcoRI              |
|                   | Reverse | AAACTCGAGCTAGCTTTCAGCAAATT        | XhoI               |
| pCS4-3×HA-Lyn     | Forward | GCGAGATCTGGATGGGATGTATTAATC       | BglII              |
|                   | Reverse | ATTCTCGAGCTACGGTTGCTGCTGA         | XhoI               |
| pcDNA3.1-MincleV5 | Forward | CCCGATCCACCATGAATTCAACCAAATCGCCTG | BamHI              |
|                   | Reverse | CCGCTCGAGGTCCAGAGGACTTATTTCTGGCAT | XhoI               |
| pcDNA4-FceR1g-Myc | Forward | CCCAAGCTTATGATCTCAGCCGTGATCTT     | HindIII            |
|                   | Reverse | CGCCTCGAGCTGGGGTGGTTTCTCATGCTT    | XhoI               |

Site-directed mutagenesis

| Mutation      |         | Primer sequence                        |
|---------------|---------|----------------------------------------|
| Shp1 DN C453S | Forward | GGCCCATCATTGTGCATAGCAGCGCTGGCATCGGCC   |
|               | Reverse | GGCCGATGCCAGCGCTGCTATGCACAATGATGGGCC   |
| Shp1 DN D419A | Forward | AGTACCTGAGCTGGCCTGCCCATGGGGTTCCAGTGAG  |
|               | Reverse | CTCACTGGGAACCCCATGGGCAGGCCAGCTCAGGTACT |
